# Supplementary material
Source: PubMed Central journal article supplement (PMC6715357)

Supplemental Figure 1. AAV vector-mediated pancreatic-specific Tardbp knockout in mice. (A) In situ hybridization of islets with a mouse Cacna1c mRNA antisense probe. Scale bar, 20  $\mu$ m. (B) Quantitative analysis of in situ hybridization. (AAV-Control group, AAV-KO group, n = 4 islets each, unpaired t-test). Values are means  $\pm$  SEM. \*p-value < 0.05; \*\*p-value < 0.01; \*\*\*p-value < 0.005; \*\*\*\*p-value < 0.001; N.S., not significant.

A

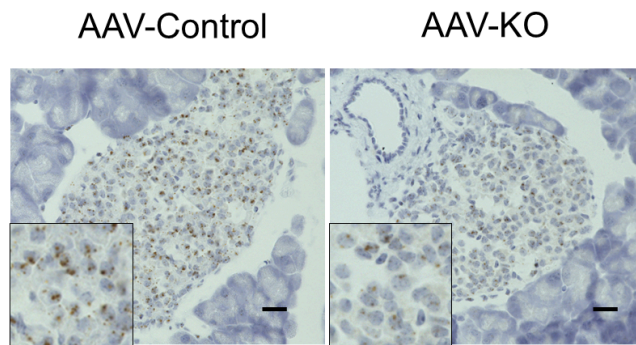

B

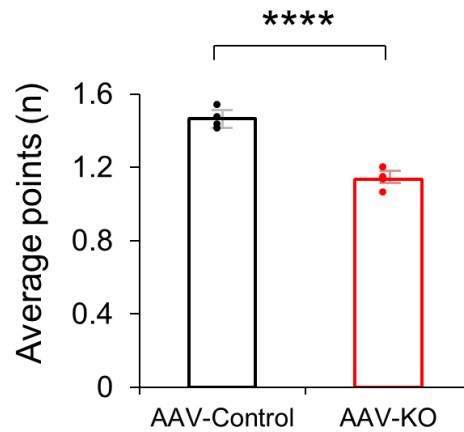

Supplemental Figure 2. Insulin secretion is suppressed in Tardbp flox mouse mated with RIP-Cre mouse (CKO-TDP). (A) In situ hybridization of islets with a mouse Cacna1c antisense RNA probe. Scale bar, 20  $\mu$ m. (B) Quantitative estimation of in situ hybridization (Tardbpflox/flox group, CKO-TDP group, n = 4 islets each, unpaired t-test). (C) Immunohistochemistry in the islets of Tardbpflox/flox and NOD mice. Nuclear TDP-43 was preserved in the islets of both mice. Scale bar, 10  $\mu$ m. Values are means  $\pm$  SEM. \*p-value < 0.05; \*\*p-value < 0.01; \*\*\*p-value < 0.005; \*\*\*\*p-value < 0.001; N.S., not significant.

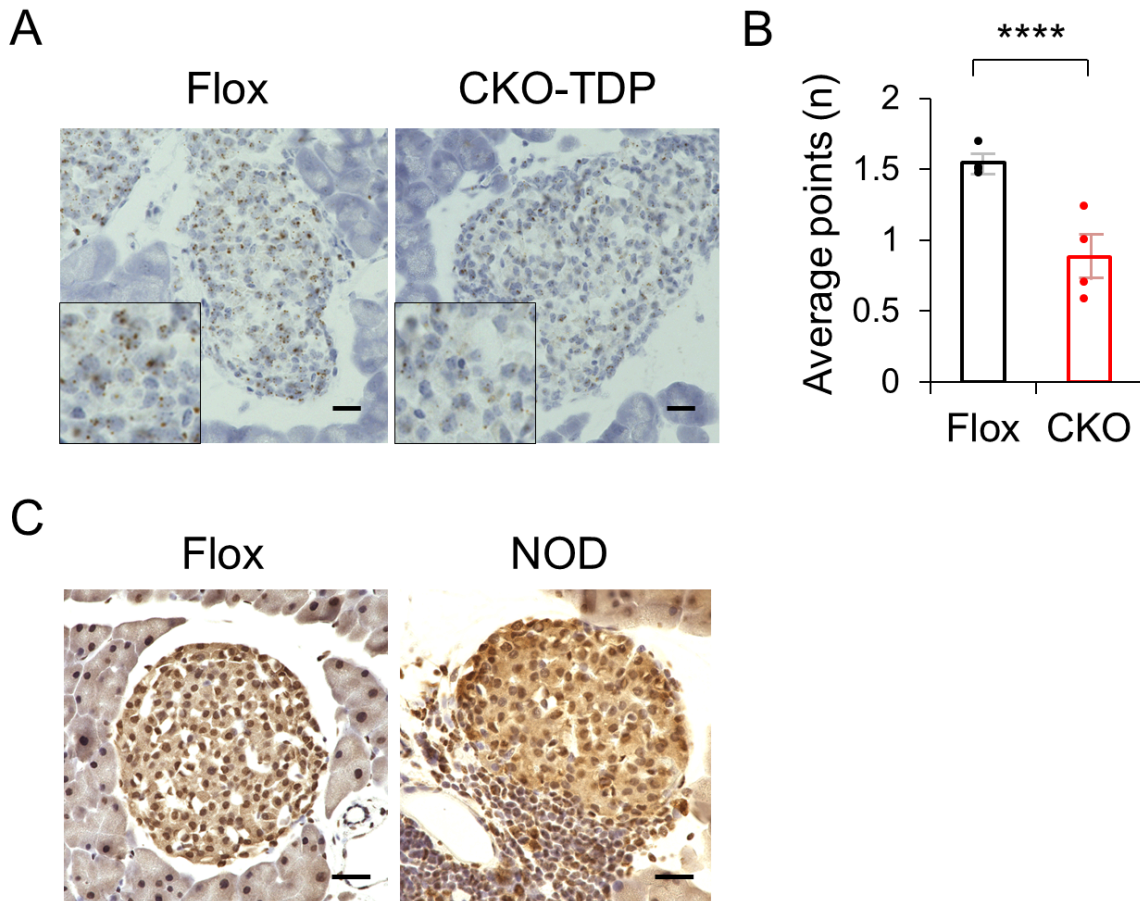

Supplement: jci-129-124481-s047.pdf [file jci-129-124481-s047.pdf]
